# Supplementary material for: Ab initio study on the excited states of pyrene and its derivatives using multi-reference perturbation theory methods
Source: Royal Society of Chemistry journal article supplement (doi:10.1039/c9ra10483f), 2020-01-01
Supplement: c9ra10483f1.pdf [file c9ra10483f1.pdf]

## Supporting Information

### **Ab initio study on the excited states of pyrene and its derivatives using multi-reference perturbation theory methods**

Soichi Shirai\* and Shinji Inagaki

\* Author to whom correspondence should be addressed.

E-mail: shirai@mosk.tytlabs.co.jp

†Toyota Central R&D Laboratories, Inc., Nagakute, Aichi 480-1192, Japan

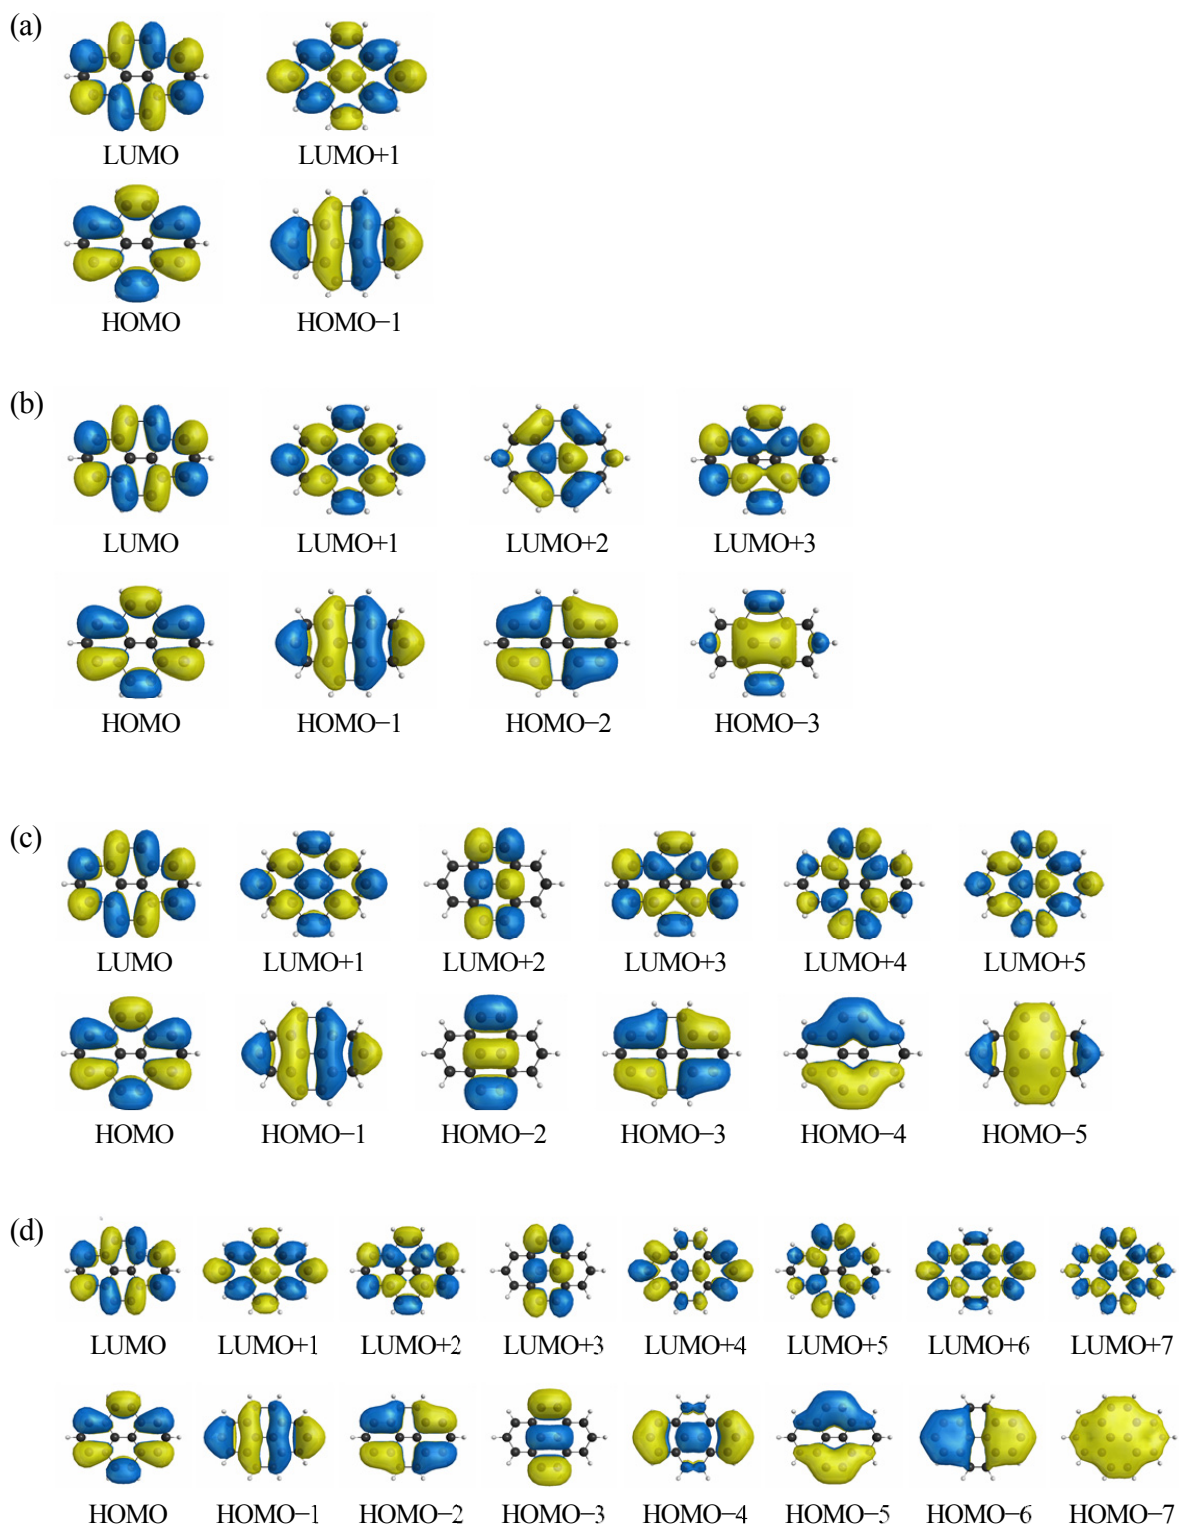

**Fig. S1** Natural orbitals of pyrene from MCSCF wave functions:  
 (a) CAS( $4\pi e$ ,  $4\pi o$ ), (b) CAS( $8\pi e$ ,  $8\pi o$ ), (c) CAS( $12\pi e$ ,  $12\pi o$ ) and (d) MRX(4).

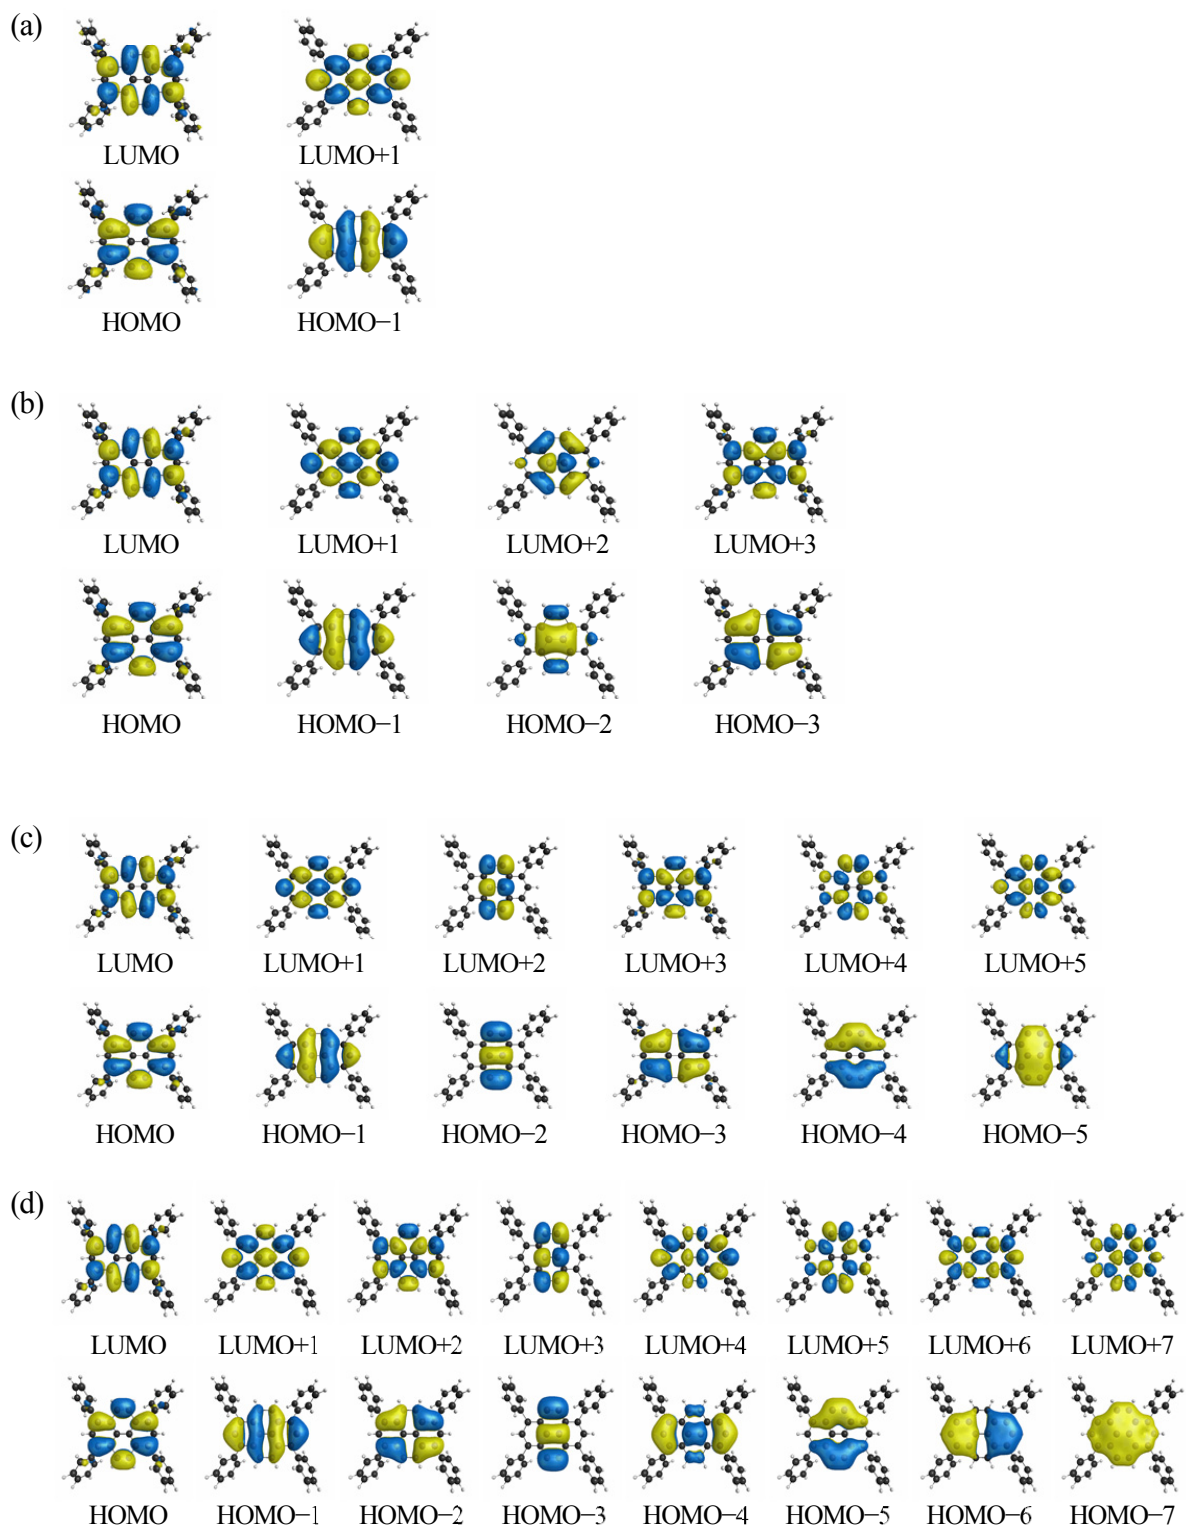

**Fig. S2** Natural orbitals of 1,3,6,8-tetraphenylpyrene (TPPy) from MCSCF wave functions:  
(a) CAS( $4\pi e$ ,  $4\pi o$ ), (b) CAS( $8\pi e$ ,  $8\pi o$ ), (c) CAS( $12\pi e$ ,  $12\pi o$ ) and (d) MRX(4).

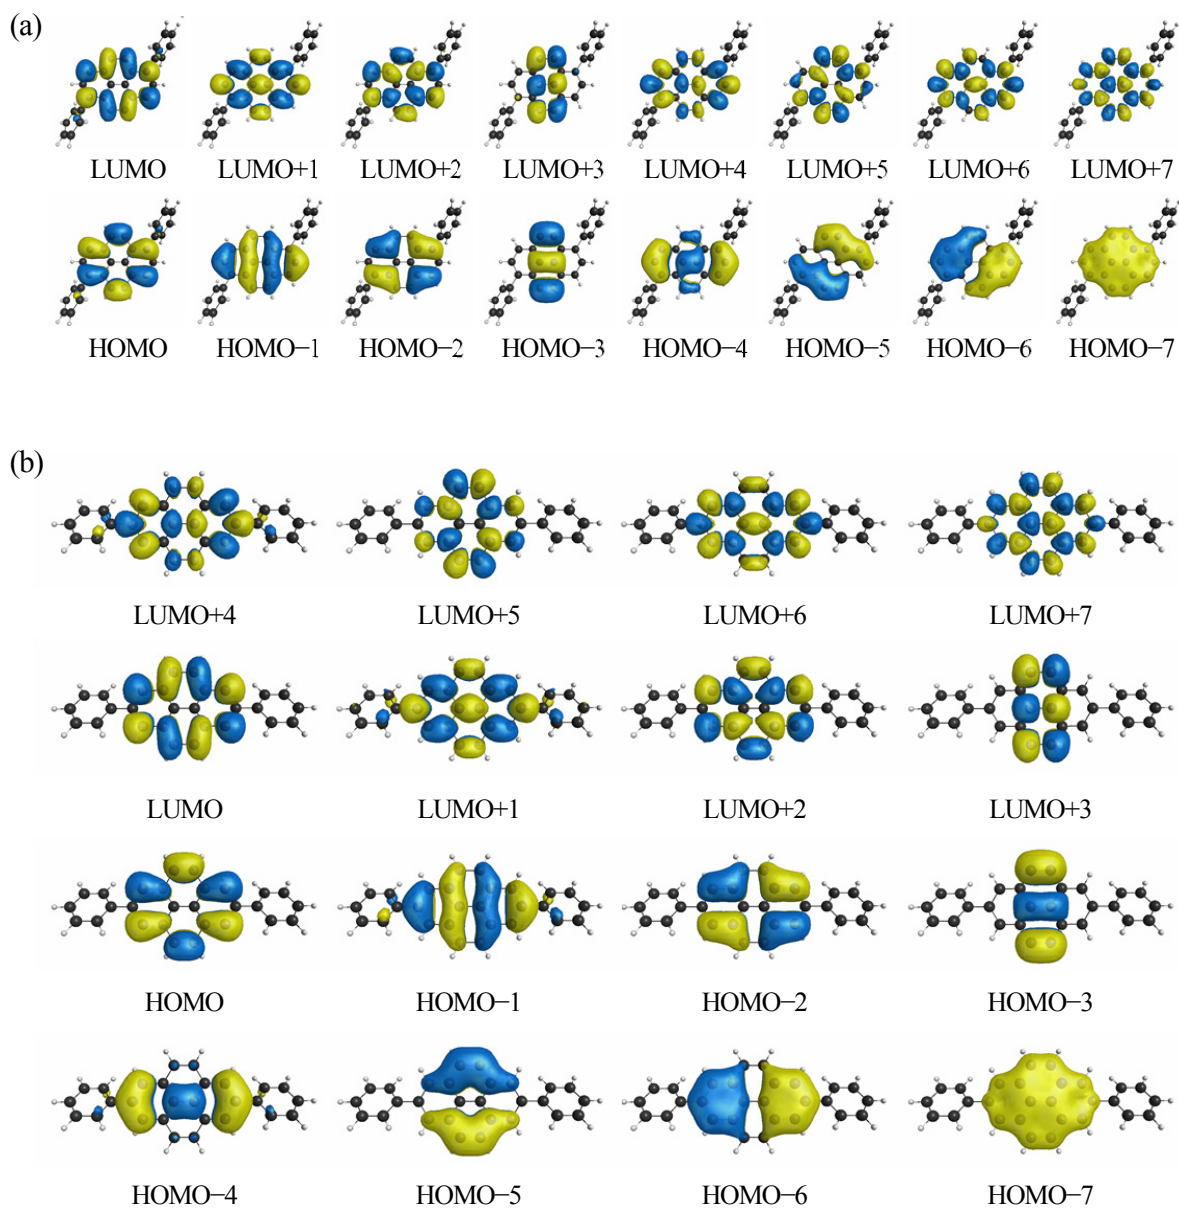

**Fig. S3** Natural orbitals of (a) 1,6-diphenylpyrene (1,6-DPPy) and (b) 2,7-diphenylpyrene (2,7-DPPy) from MCSCF wave functions with MRX(4) configuration space.

**Table S1.** Calculated electronic total energies and excitation energies.

| molecule | method  | reference space               | electronic state total energy |              |              | excitation energy |         |
|----------|---------|-------------------------------|-------------------------------|--------------|--------------|-------------------|---------|
|          |         |                               | ground state                  | $^1L_a$      | $^1L_b$      | $^1L_a$           | $^1L_b$ |
| pyrene   | GMCSCF  | MRX(2)                        | -611.963398                   | -611.683908  | -611.732426  | 7.61              | 6.28    |
|          |         | MRX(3)                        | -611.969412                   | -611.773601  | -611.827047  | 5.33              | 3.87    |
|          |         | MRX(4)                        | -611.998334                   | -611.786239  | -611.854412  | 5.77              | 3.92    |
|          | CASSCF  | CAS(4 $\pi e$ , 4 $\pi o$ )   | -611.826258                   | -611.630826  | -611.633173  | 5.32              | 5.25    |
|          |         | CAS(8 $\pi e$ , 8 $\pi o$ )   | -611.873724                   | -611.673541  | -611.698314  | 5.45              | 4.77    |
|          |         | CAS(12 $\pi e$ , 12 $\pi o$ ) | -611.938240                   | -611.733420  | -611.773669  | 5.57              | 4.48    |
|          | GMCQDPT | MRX(2)                        | -613.895808                   | -613.757849  | -613.779477  | 3.75              | 3.17    |
|          |         | MRX(3)                        | -613.898739                   | -613.758249  | -613.777274  | 3.82              | 3.31    |
|          |         | MRX(4)                        | -613.904548                   | -613.763264  | -613.779616  | 3.84              | 3.40    |
|          | MCQDPT  | CAS(4 $\pi e$ , 4 $\pi o$ )   | -613.888464                   | -613.758129  | -613.784435  | 3.55              | 2.83    |
|          |         | CAS(8 $\pi e$ , 8 $\pi o$ )   | -613.895007                   | -613.757183  | -613.775339  | 3.75              | 3.26    |
|          |         | CAS(12 $\pi e$ , 12 $\pi o$ ) | -613.912130                   | -613.771275  | -613.764713  | 3.83              | 4.01    |
| EOM-CCSD |         | -613.927251                   | -613.763560                   | -613.786867  | 4.45         | 3.82              |         |
| TPPy     | GMCSCF  | MRX(2)                        | -1530.208096                  | -1529.939689 | -1529.982544 | 7.30              | 6.14    |
|          |         | MRX(3)                        | -1530.214345                  | -1530.028781 | -1530.075887 | 5.05              | 3.77    |
|          |         | MRX(4)                        | -1530.243303                  | -1530.040528 | -1530.102935 | 5.52              | 3.82    |
|          | CASSCF  | CAS(4 $\pi e$ , 4 $\pi o$ )   | -1530.072126                  | -1529.887052 | -1529.892707 | 5.04              | 4.88    |
|          |         | CAS(8 $\pi e$ , 8 $\pi o$ )   | -1530.119736                  | -1529.934120 | -1529.950080 | 5.05              | 4.62    |
|          |         | CAS(12 $\pi e$ , 12 $\pi o$ ) | -1530.183896                  | -1529.992171 | -1530.023859 | 5.22              | 4.35    |
|          | GMCQDPT | MRX(2)                        | -1535.272512                  | -1535.158154 | -1535.163555 | 3.11              | 2.96    |
|          |         | MRX(3)                        | -1535.274668                  | -1535.154509 | -1535.159934 | 3.27              | 3.12    |
|          |         | MRX(4)                        | -1535.280775                  | -1535.167838 | -1535.161723 | 3.07              | 3.24    |
|          | MCQDPT  | CAS(4 $\pi e$ , 4 $\pi o$ )   | -1535.277130                  | -1535.169965 | -1535.181531 | 2.92              | 2.60    |
|          |         | CAS(8 $\pi e$ , 8 $\pi o$ )   | -1535.306796                  | -1535.191025 | -1535.195163 | 3.15              | 3.04    |
|          |         | CAS(12 $\pi e$ , 12 $\pi o$ ) | -1535.368049                  | -1535.232284 | -1535.236305 | 3.69              | 3.58    |
| EOM-CCSD |         | -1535.391457                  | -1535.247783                  | -1535.257238 | 3.91         | 3.65              |         |
| 1,6-DPPy | GMCSCF  | MRX(4)                        | -1071.121009                  | -1070.913546 | -1070.978846 | 5.65              | 3.87    |
|          | GMCQDPT | MRX(4)                        | -1074.592114                  | -1074.467613 | -1074.470366 | 3.39              | 3.31    |
| 2,7-DPPy | GMCSCF  | MRX(4)                        | -1071.128369                  | -1070.917149 | -1070.987240 | 5.75              | 3.84    |
|          | GMCQDPT | MRX(4)                        | -1074.592383                  | -1074.458462 | -1074.471182 | 3.64              | 3.30    |

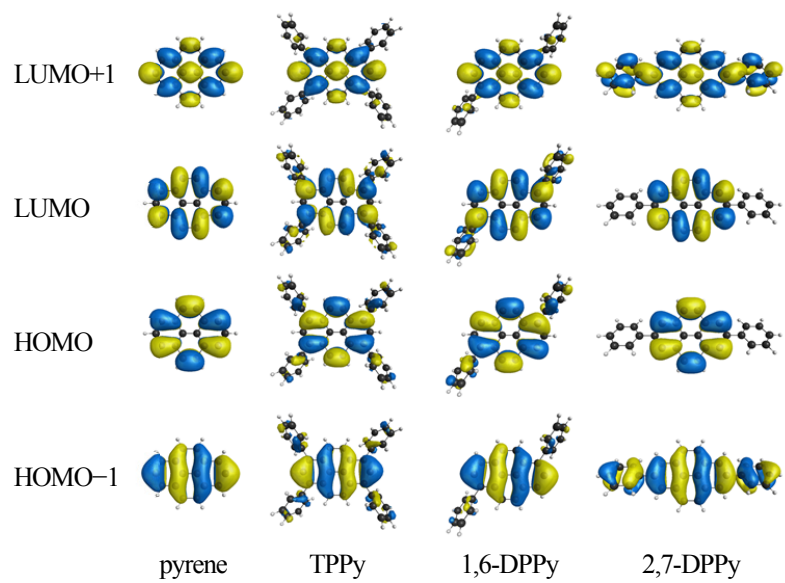

**Fig. S4** Molecular orbitals of pyrene, TPPy, 1,6-DPPy, and 2,7-DPPy obtained from the Hartee-Fock calculations.
